# Supplementary material for: The clinicopathological significance and prognostic value of EMMPRIN overexpression in cancers: evidence from 39 cohort studies
Source: PubMed Central journal article supplement (PMC5669917; doi:10.18632/oncotarget.19740), 2017-07-31
Supplement: oncotarget-08-82643-s001.pdf [file oncotarget-08-82643-s001.pdf]

# The clinicopathological significance and prognostic value of EMMPRIN overexpression in cancers: evidence from 39 cohort studies

## SUPPLEMENTARY MATERIALS

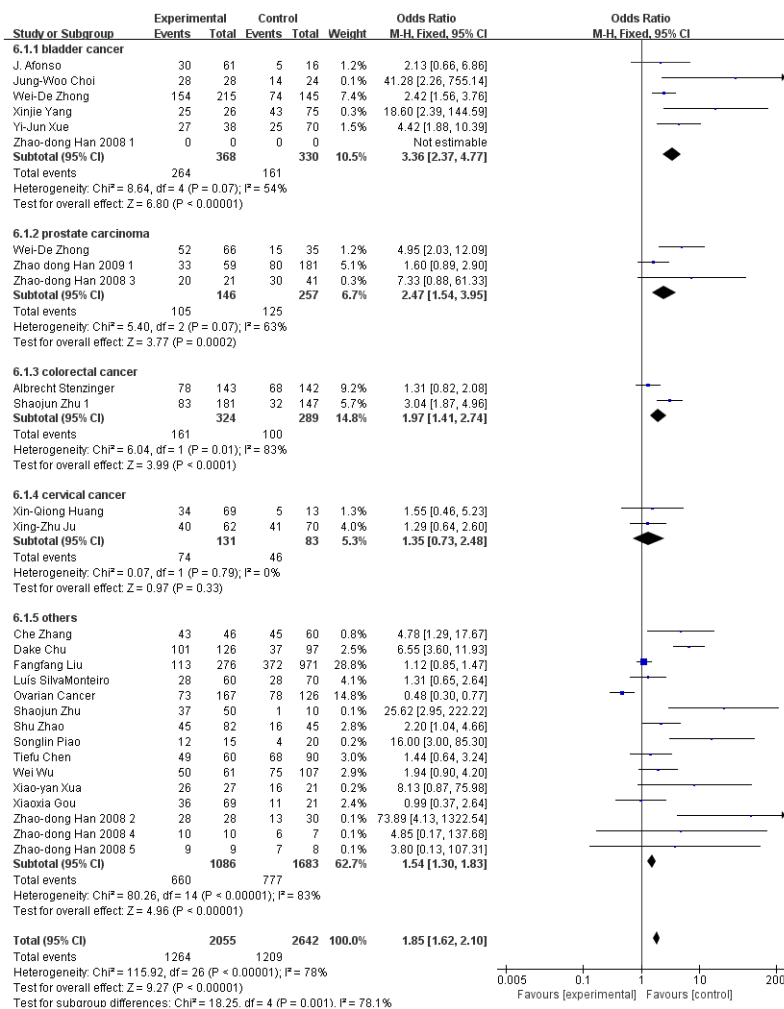

Supplementary Figure 1: Subgroup analysis of tumor stage based on cancer types.

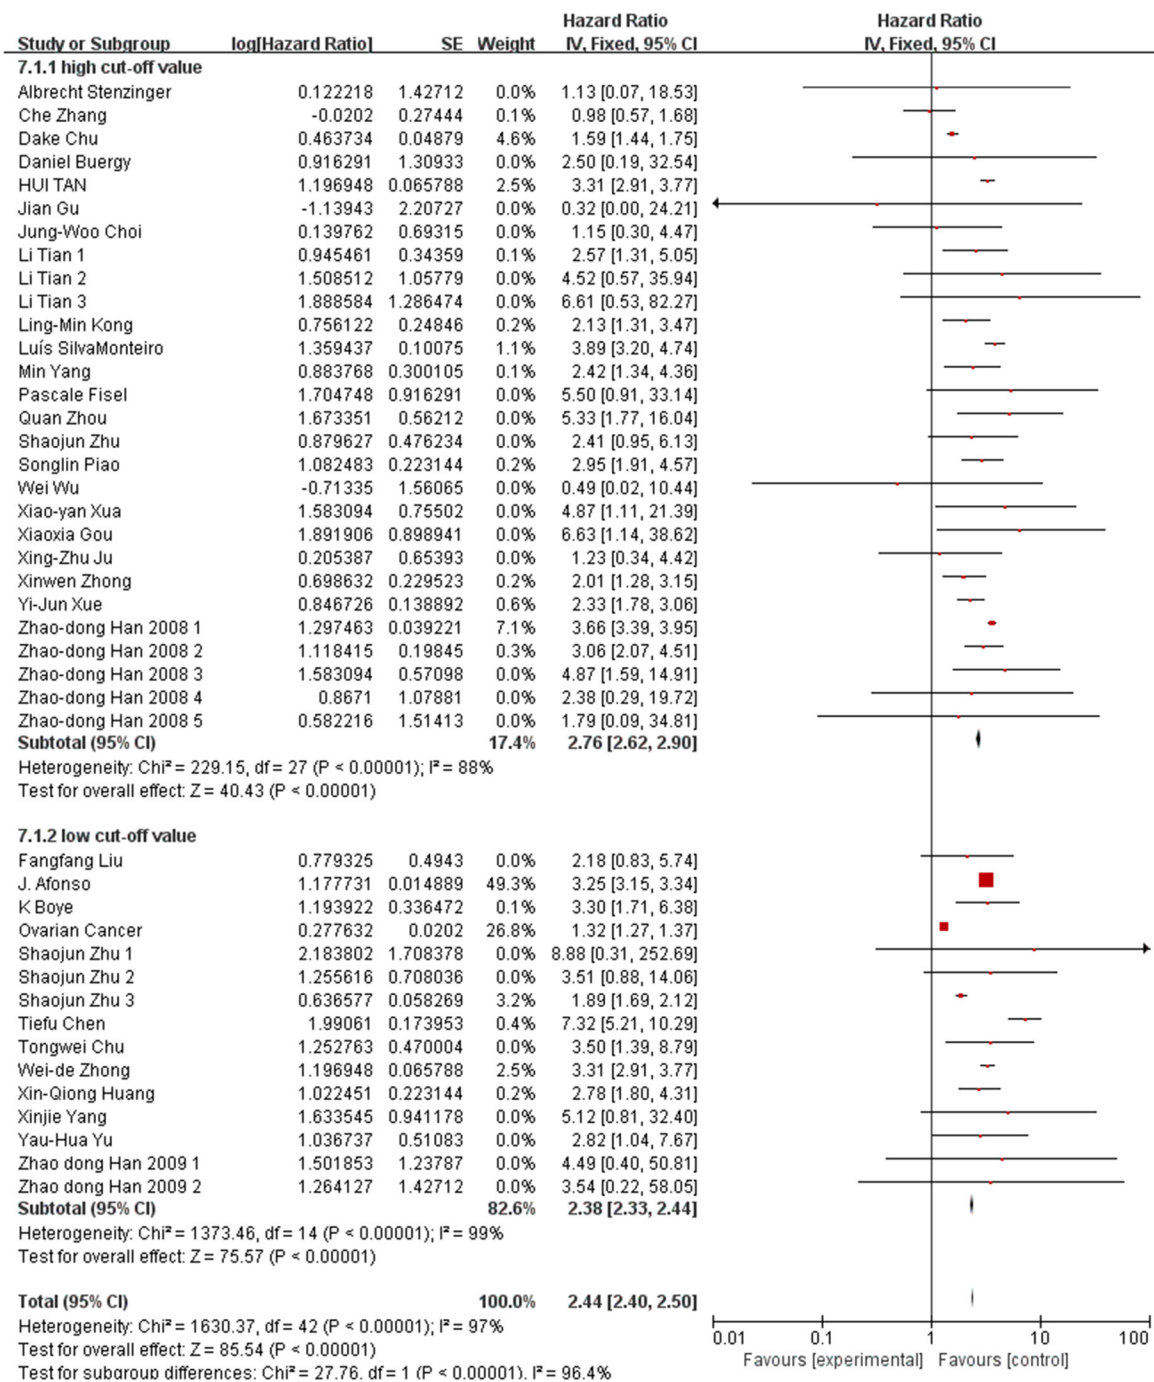

Supplementary Figure 2: Subgroup analysis based on the EMMPRIN positive expression determination.
